# Supplementary material
Source: PubMed Central journal article supplement (PMC3058791)
Supplement: NIHMS273033-supplement-Supp1.pdf [file NIHMS273033-supplement-Supp1.pdf]

## **Supplemental Material**

Supplemental Table 1. Characteristics of 6,329 Eligible NHANES 2003 to 2006 Participants, Weighted to Reflect the CVD-free, Nonpregnant, 20- to 79-Year Old

U.S. Population - by Demographic Stratum

|       | Mean (SD) of Risk Factor Level |             |               |                |                |                             | Percentage (SE) with Risk Factor |                |                 |                          |
|-------|--------------------------------|-------------|---------------|----------------|----------------|-----------------------------|----------------------------------|----------------|-----------------|--------------------------|
|       | Age (years)                    | TC (mg/dL)  | HDL-C (mg/dL) | SBP<br>(mm Hg) | DBP<br>(mm Hg) | BMI<br>(kg/m <sup>2</sup> ) | DM<br>(%)                        | Smoking<br>(%) | Anti-HTN tx (%) | Lipid-lowering<br>Tx (%) |
| Total | 44.0 (0.4)                     | 200.6 (0.7) | 54.2 (0.3)    | 121.0 (0.3)    | 71.1 (0.2)     | 28.2 (0.2)                  | 5.6 (0.4)                        | 25.9 (1.0)     | 16.5 (0.6)      | 10.6 (0.6)               |
| Sex   |                                |             |               |                |                |                             |                                  |                |                 |                          |
| Men   | 43.0 (0.4)                     | 199.7 (0.8) | 48.5 (0.3)    | 122.6 (0.4)    | 72.2 (0.3)     | 28.3 (0.1)                  | 5.3 (0.5)                        | 29.7 (1.4)     | 14.9 (0.8)      | 10.7 (0.7)               |
| Women | 45.0 (0.4)                     | 201.5 (1.0) | 59.9 (0.5)    | 119.3 (0.4)    | 70.1 (0.3)     | 28.1 (0.2)                  | 5.9 (0.5)                        | 22.3 (0.9)     | 18.0 (0.7)      | 10.5 (0.9)               |
| Age   |                                |             |               |                |                |                             |                                  |                |                 |                          |
| Men   |                                |             |               |                |                |                             |                                  |                |                 |                          |
| 20-29 | 24.3 (0.1)                     | 180.5 (1.7) | 48.2 (0.5)    | 118.0 (0.5)    | 66.3 (0.5)     | 26.8 (0.3)                  | 0.4 (0.2)                        | 38.8 (2.4)     | 1.4 (0.5)       | 0.4 (0.3)                |
| 30-39 | 34.5 (0.2)                     | 200.0 (1.7) | 48.1 (0.5)    | 119.6 (0.6)    | 72.5 (0.6)     | 28.3 (0.2)                  | 2.3 (0.6)                        | 31.3 (1.9)     | 4.6 (0.7)       | 1.5 (0.6)                |
| 40-49 | 44.5 (0.2)                     | 210.6 (1.6) | 47.2 (0.5)    | 121.8 (0.7)    | 75.9 (0.4)     | 29.2 (0.3)                  | 4.6 (0.9)                        | 29.3 (2.0)     | 13.2 (1.5)      | 9.1 (1.6)                |
| 50-59 | 53.7 (0.1)                     | 207.7 (2.1) | 50.0 (0.7)    | 126.6 (0.9)    | 75.6 (0.6)     | 28.8 (0.3)                  | 9.0 (1.3)                        | 27.1 (2.2)     | 23.2 (2.2)      | 20.5 (1.8)               |
| 60-69 | 64.1 (0.1)                     | 201.8 (2.2) | 48.9 (0.6)    | 129.6 (1.4)    | 71.5 (0.6)     | 28.9 (0.3)                  | 13.5 (1.6)                       | 23.1 (2.5)     | 42.2 (2.8)      | 28.1 (2.2)               |
| 70-79 | 74.0 (0.2)                     | 194.7 (2.1) | 51.2 (0.8)    | 131.6 (1.3)    | 66.9 (0.9)     | 28.0 (0.4)                  | 13.8 (2.4)                       | 7.9 (1.9)      | 43.9 (3.3)      | 33.6 (3.3)               |
| Women |                                |             |               |                |                |                             |                                  |                |                 |                          |
| 20-29 | 24.4 (0.2)                     | 178.5 (1.7) | 57.8 (1.0)    | 108.5 (0.5)    | 65.7 (0.3)     | 26.3 (0.4)                  | 1.4 (0.5)                        | 28.7 (2.5)     | 0.4 (0.3)       | 0.6 (0.3)                |
| 30-39 | 34.5 (0.1)                     | 195.9 (1.7) | 58.7 (0.7)    | 111.0 (0.5)    | 68.8 (0.4)     | 27.8 (0.4)                  | 2.4 (0.6)                        | 25.0 (2.4)     | 3.0 (0.7)       | 1.9 (0.7)                |
| 40-49 | 44.3 (0.2)                     | 200.9 (1.6) | 59.3 (0.9)    | 118.6 (0.8)    | 73.7 (0.7)     | 28.8 (0.4)                  | 5.0 (1.0)                        | 26.0 (1.7)     | 12.2 (1.2)      | 6.4 (1.3)                |
| 50-59 | 54.0 (0.1)                     | 215.6 (2.7) | 61.8 (1.0)    | 124.1 (1.1)    | 73.7 (0.7)     | 29.2 (0.4)                  | 8.6 (1.4)                        | 17.5 (2.3)     | 31.0 (2.4)      | 18.1 (2.5)               |

|                  |            |             |            |             |            |            |            |            |            |            |
|------------------|------------|-------------|------------|-------------|------------|------------|------------|------------|------------|------------|
| 60-69            | 64.2 (0.1) | 218.5 (2.4) | 60.9 (1.0) | 132.0 (1.2) | 70.0 (0.6) | 28.9 (0.5) | 12.4 (1.5) | 14.9 (1.9) | 43.6 (2.6) | 21.5 (1.8) |
| 70-79            | 73.7 (0.2) | 213.1 (2.3) | 63.0 (1.1) | 139.0 (1.4) | 64.0 (1.1) | 27.1 (0.4) | 12.9 (1.6) | 10.7 (1.6) | 48.9 (3.1) | 34.9 (2.6) |
| Race             |            |             |            |             |            |            |            |            |            |            |
| Men              |            |             |            |             |            |            |            |            |            |            |
| White            | 44.2 (0.5) | 200.5 (1.0) | 48.3 (0.4) | 122.6 (0.6) | 72.4 (0.3) | 28.4 (0.2) | 4.6 (0.6)  | 29.5 (1.8) | 15.8 (1.0) | 11.9 (0.8) |
| Black            | 41.3 (0.7) | 191.9 (1.9) | 52.4 (0.6) | 126.3 (0.6) | 72.7 (0.7) | 28.3 (0.3) | 7.8 (1.0)  | 31.0 (2.0) | 17.6 (1.5) | 8.3 (1.1)  |
| Mexican-American | 38.6 (0.8) | 198.4 (1.3) | 46.6 (0.5) | 120.3 (0.6) | 70.9 (0.6) | 27.8 (0.3) | 6.0 (0.8)  | 31.9 (2.4) | 8.6 (1.8)  | 5.1 (1.1)  |
| Other            | 40.5 (1.8) | 212.7 (4.6) | 47.3 (1.3) | 121.5 (1.3) | 70.4 (1.2) | 28.2 (0.4) | 10.2 (4.3) | 19.8 (5.9) | 12.2 (4.5) | 13.5 (3.6) |
| Women            |            |             |            |             |            |            |            |            |            |            |
| White            | 46.5 (0.4) | 203.9 (1.2) | 60.3 (0.6) | 119.2 (0.5) | 70.1 (0.4) | 27.7 (0.3) | 5.0 (0.5)  | 23.9 (1.3) | 18.5 (0.9) | 11.2 (1.1) |
| Black            | 42.1 (0.7) | 192.4 (1.7) | 60.4 (0.8) | 123.2 (0.8) | 70.9 (0.5) | 31.1 (0.3) | 8.8 (1.2)  | 21.6 (2.4) | 26.4 (1.5) | 8.0 (0.8)  |
| Mexican-American | 40.5 (0.5) | 196.7 (1.8) | 57.4 (0.8) | 117.5 (0.9) | 69.5 (0.5) | 27.7 (0.3) | 6.9 (1.1)  | 14.7 (2.1) | 10.9 (1.6) | 8.7 (1.6)  |
| Other            | 41.1 (1.3) | 199.1 (4.3) | 57.3 (1.8) | 116.5 (1.8) | 69.3 (0.9) | 28.2 (0.6) | 11.5 (2.3) | 19.0 (3.2) | 9.7 (3.8)  | 9.2 (3.5)  |

---

SD=standard deviation, SE=standard error, TC=total cholesterol, HDL-C=high-density lipoprotein cholesterol, SBP=systolic blood pressure, DBP=diastolic blood pressure, BMI=body mass index, DM=diabetes mellitus, HTN=hypertension, Tx=treatment.

Supplemental Table 2. Characteristics of 6,329 Eligible NHANES 2003 to 2006 Participants, Weighted to Reflect the CVD-free, Nonpregnant, 20- to 79-Year Old U.S. Population - by Risk Stratum

|                      | Mean (SD) of Risk Factor Level |               |                  |                |                |                             | Percentage (SE) with Risk Factor |                |                    |                          |
|----------------------|--------------------------------|---------------|------------------|----------------|----------------|-----------------------------|----------------------------------|----------------|--------------------|--------------------------|
|                      | Age<br>(years)                 | TC<br>(mg/dL) | HDL-C<br>(mg/dL) | SBP<br>(mm Hg) | DBP<br>(mm Hg) | BMI<br>(kg/m <sup>2</sup> ) | DM<br>(%)                        | Smoking<br>(%) | Anti-HTN<br>tx (%) | Lipid-lowering<br>Tx (%) |
| Overall              | 44.0 (0.4)                     | 200.6 (0.7)   | 54.2 (0.3)       | 121.0 (0.3)    | 71.1 (0.2)     | 28.2 (0.2)                  | 5.6 (0.4)                        | 25.9 (1.0)     | 16.5 (0.6)         | 10.6 (0.6)               |
| Low 10-yr CHD risk*  | 40.6 (0.3)                     | 198.4 (0.7)   | 55.4 (0.3)       | 118.4 (0.3)    | 71.0 (0.2)     | 27.9 (0.2)                  | -                                | 24.5 (1.0)     | 10.7 (0.5)         | 6.7 (0.5)                |
| All Optimal          | 32.6 (0.6)                     | 156.5 (1.0)   | 54.4 (0.5)       | 107.3 (0.3)    | 65.0 (0.4)     | 25.6 (0.2)                  | -                                | -              | -                  | -                        |
| ≥1 Not Optimal       | 38.0 (0.5)                     | 179.7 (0.9)   | 54.5 (0.6)       | 118.0 (0.4)    | 71.2 (0.4)     | 27.9 (0.3)                  | -                                | -              | -                  | -                        |
| ≥1 Elevated          | 42.7 (0.5)                     | 213.4 (0.5)   | 57.3 (0.6)       | 120.2 (0.5)    | 73.1 (0.4)     | 28.4 (0.3)                  | -                                | -              | -                  | -                        |
| 1 Major              | 41.4 (0.4)                     | 206.2 (1.3)   | 54.9 (0.4)       | 119.7 (0.5)    | 71.0 (0.4)     | 27.9 (0.2)                  | -                                | 52.7 (1.5)     | 13.9 (1.0)         | 7.7 (0.9)                |
| ≥2 Major             | 49.0 (0.7)                     | 230.2 (2.4)   | 56.1 (0.8)       | 126.2 (1.2)    | 74.3 (0.7)     | 29.6 (0.3)                  | -                                | 53.1 (2.5)     | 56.2 (2.4)         | 38.4 (3.2)               |
| High 10-yr CHD risk* | 59.7 (0.4)                     | 210.8 (1.8)   | 48.8 (0.5)       | 132.5 (0.6)    | 71.7 (0.5)     | 29.8 (0.2)                  | 31.2 (1.7)                       | 32.5 (1.8)     | 42.6 (1.5)         | 28.4 (1.8)               |

\*10-year hard coronary heart disease risk calculated based on D'Agostino *et al* 2001,<sup>9</sup> with "low" defined as <10% 10-year predicted CHD risk and absence of diabetes.

SD=standard deviation, SE=standard error, TC=total cholesterol, HDL-C=high-density lipoprotein cholesterol, SBP=systolic blood pressure, DBP=diastolic blood pressure, BMI=body mass index, DM=diabetes mellitus, HTN=hypertension, Tx=treatment, CHD=coronary heart disease.

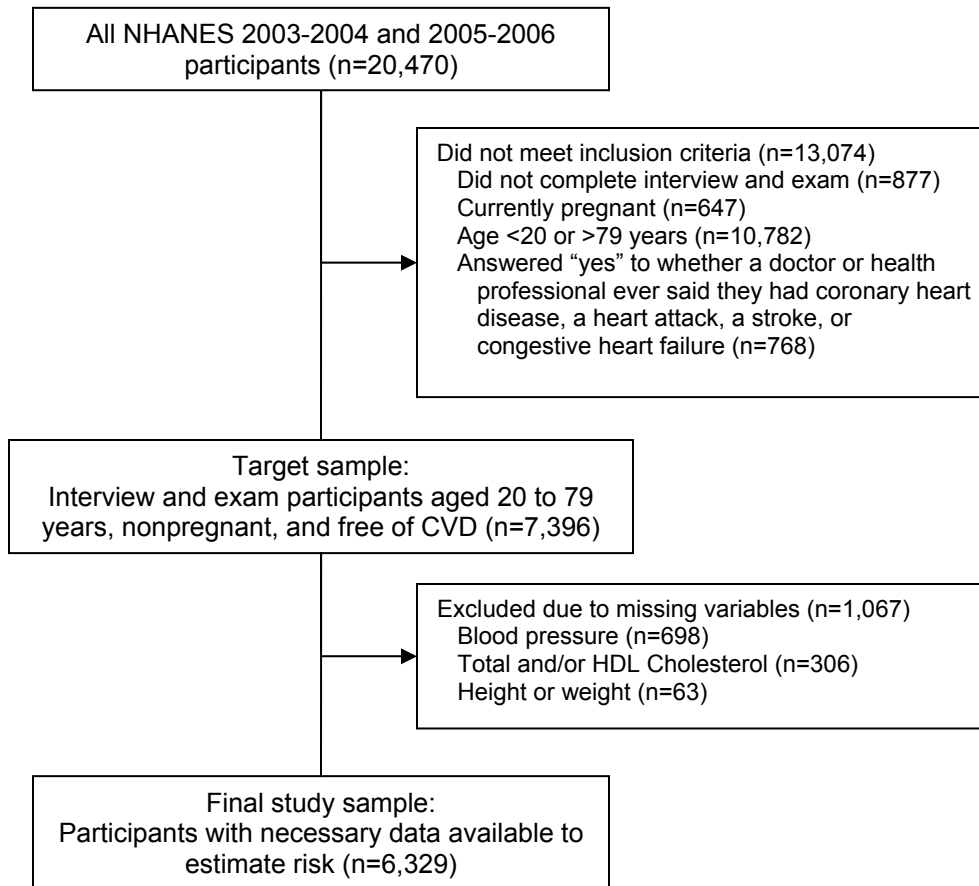

Supplemental Figure 1. Selection of study sample. CVD=cardiovascular disease, HDL=high-density lipoprotein.
